# Supplementary material
Source: PubMed Central journal article supplement (PMC3715795)
Supplement: Supp_Fig2.pdf [file Supp_Fig2.pdf]

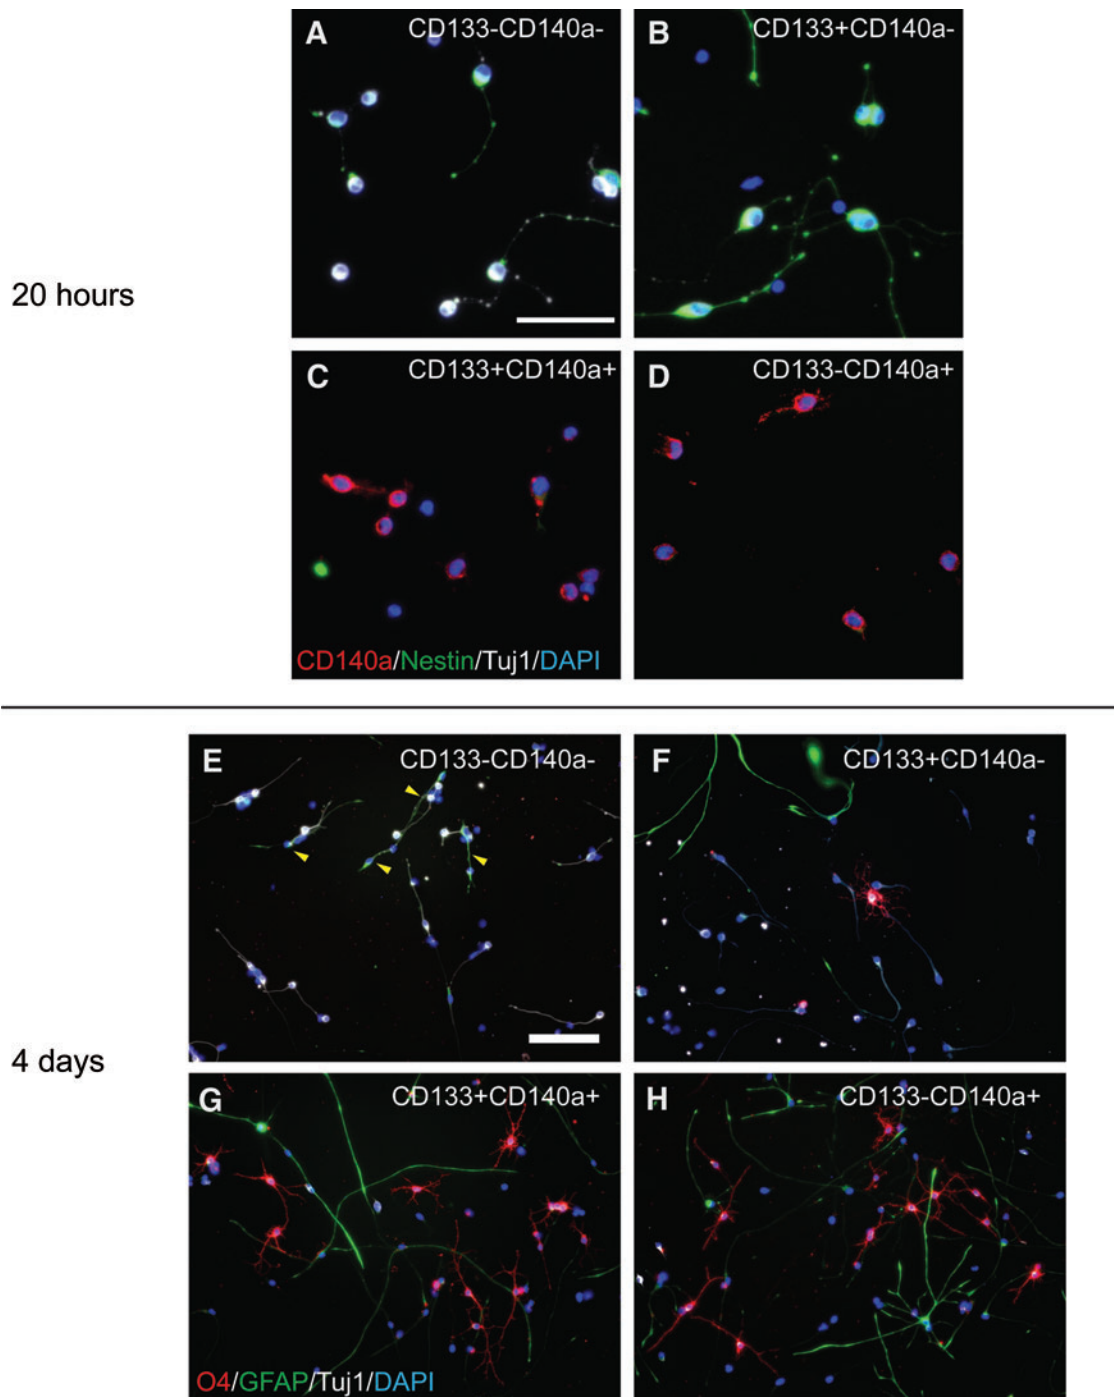

**SUPPLEMENTARY FIG. S2.** Immunophenotyping of CD133/CD140a-sorted cells. The phenotype of FACS-sorted fractions was examined on day 1 (A–D) and day 4 (E–H) postsort. (A–D) The immediate phenotype of CD133/CD140a-sorted cells was assessed at 20 h for markers of neurons (Tuj1, white), neural stem/progenitor cells (nestin, green), and oligodendrocyte progenitor cells (CD140a/PDGFR, red). (E–H) Cells were cultured in the absence of growth factors to encourage oligodendrocyte differentiation for 4 days. Differentiation was assayed by staining for neurons (Tuj1, white), oligodendrocytes (O4, red), and astrocytes (GFAP, green). The vast majority of CD133<sup>-</sup>CD140a<sup>-</sup> cells were Tuj1<sup>+</sup> neurons. However, occasional astrocytes (arrowhead in E) were observed. Scale Bars: 50 μm in (A) and 100 μm in (E).
